# Supplementary material
Source: publisher figshare collection journal article supplement (https://acs.figshare.com/ndownloader/files/4618867)
Supplement: Supplementary file 1 [file 4618867]

# Supporting Information

For

## Enhanced Sonocatalytic Degradation of Azo Dyes by $\text{Au/TiO}_2$

*Yifeng Wang, Dan Zhao, Wanhong Ma, Chuncheng Chen, Jincai Zhao\**

Key Laboratory of Photochemistry, Beijing National Laboratory for Molecular Sciences, Institute of  
Chemistry, The Chinese Academy of Sciences, Beijing 100080, China

E-mail: [jczhao@iccas.ac.cn](mailto:jczhao@iccas.ac.cn)

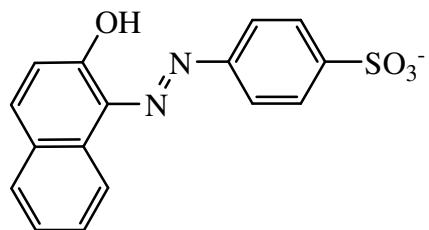

Orange II

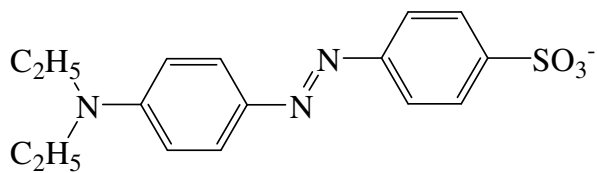

Ethyl orange

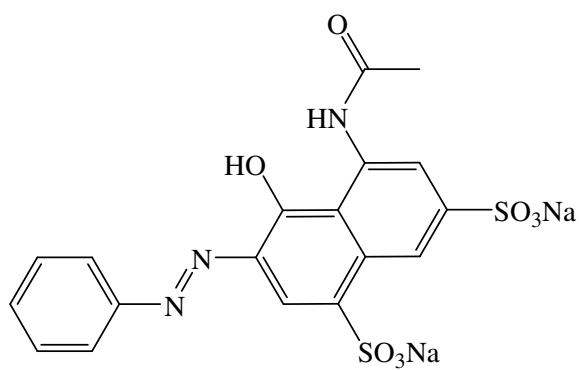

Acid red G

**Figure S1. Structures of the dyes used in this article.**

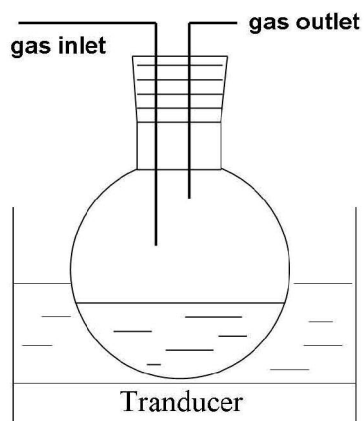

**Figure S2. Schematic description of the ultrasonic setup.**

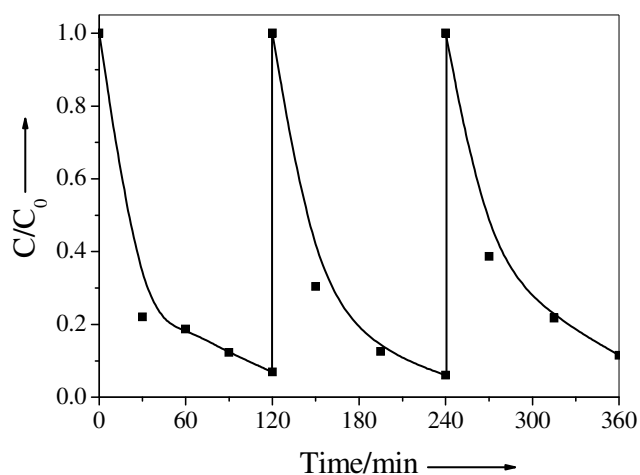

**Figure S3. Repeated experiments of sonocatalytic degradation of Org II (100ml,  $5.0 \times 10^{-5}$  M, pH = 3.5) with Au/TiO<sub>2</sub> (1 g/L) under Ar atmosphere. Org II (1 ml,  $5.0 \times 10^{-3}$  M) was added after each run. The Au/TiO<sub>2</sub> catalyst remained the high sonocatalytic activity and the high stability in sonocatalytic degradation of Org II. That the degradation rates reduced slightly was probably due to incomplete mineralization of the dye during the last run.**

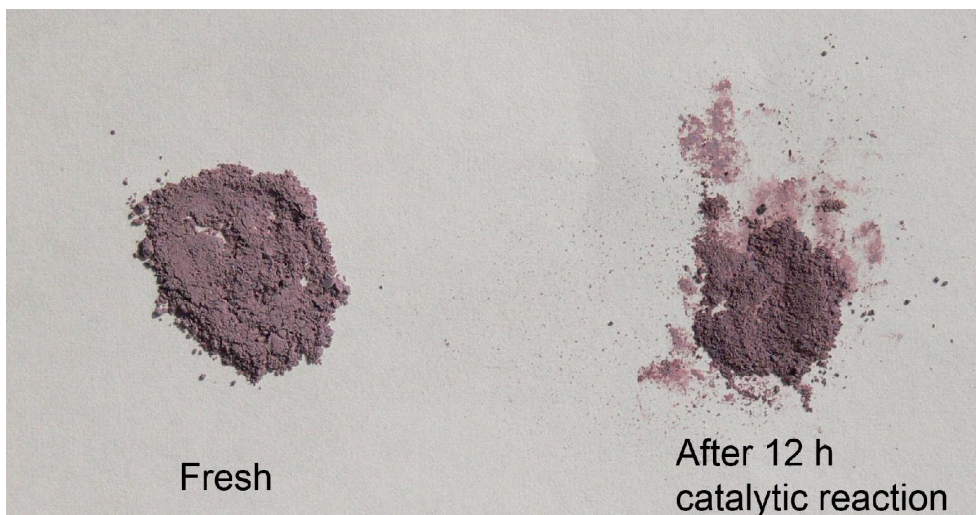

**Figure S4. Photographs of the Au/TiO<sub>2</sub> catalyst before and after 12 hours of use.**

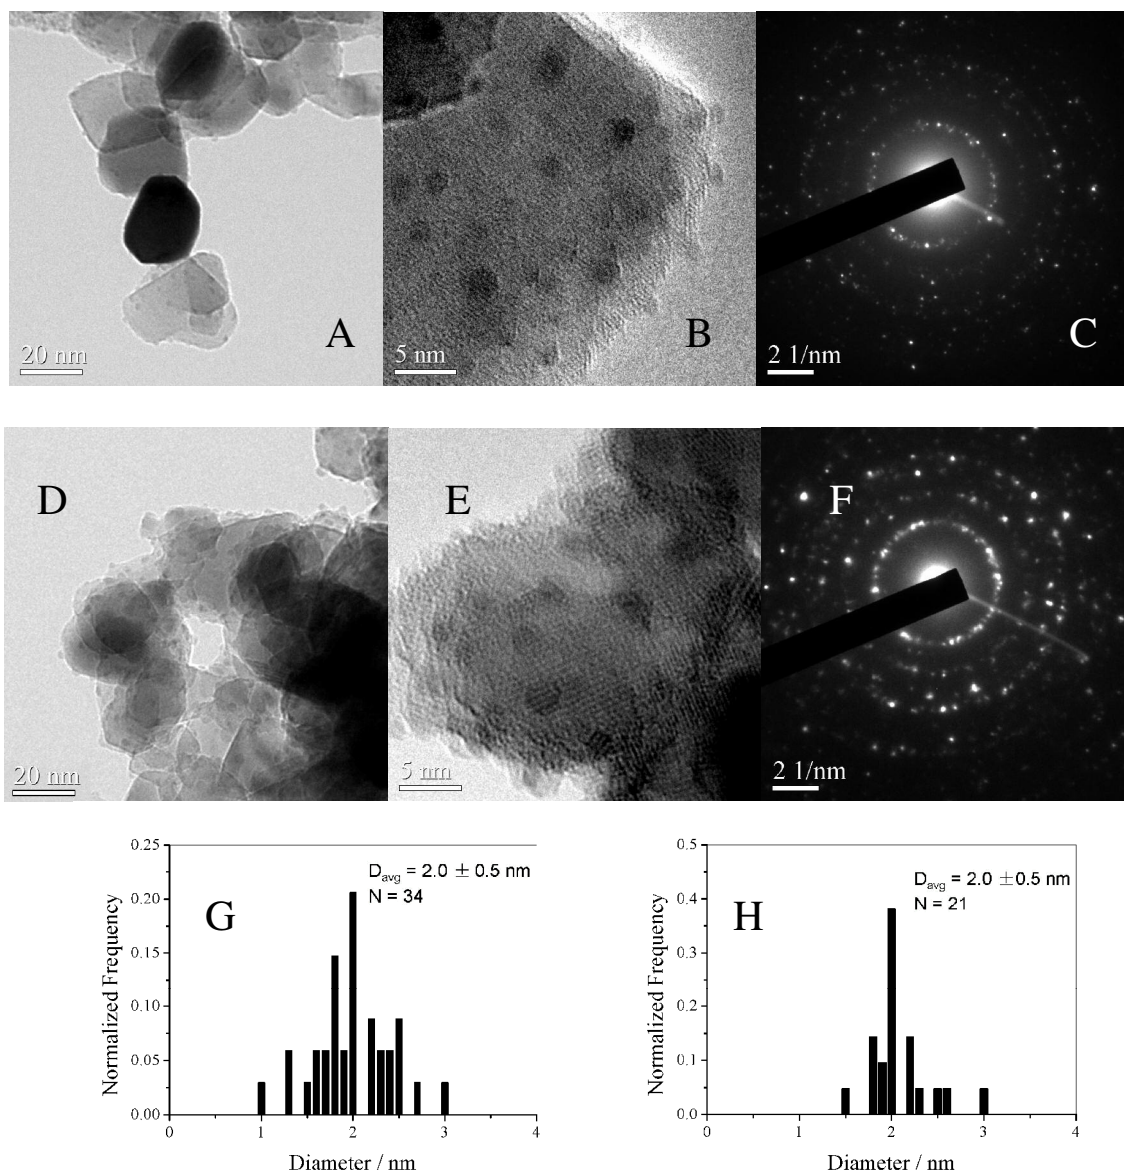

**Figure S5. TEM characterization of the Au/TiO<sub>2</sub> catalyst (A-C, G) before and (D-F, H) after 12 hours of use. (A) and (D) TEM image, (B) and (E) HRTEM images, (C) and (F) electron diffraction patterns, (G) and (H) diameter distribution of Au nanoparticles. No apparent change in crystallization of TiO<sub>2</sub> or in size distribution of Au nanoparticles was observed after 12 hours of use. No release of Au nanoparticles from Au/TiO<sub>2</sub> was observed. The results indicated a high stability of Au/TiO<sub>2</sub> under current usage conditions.**

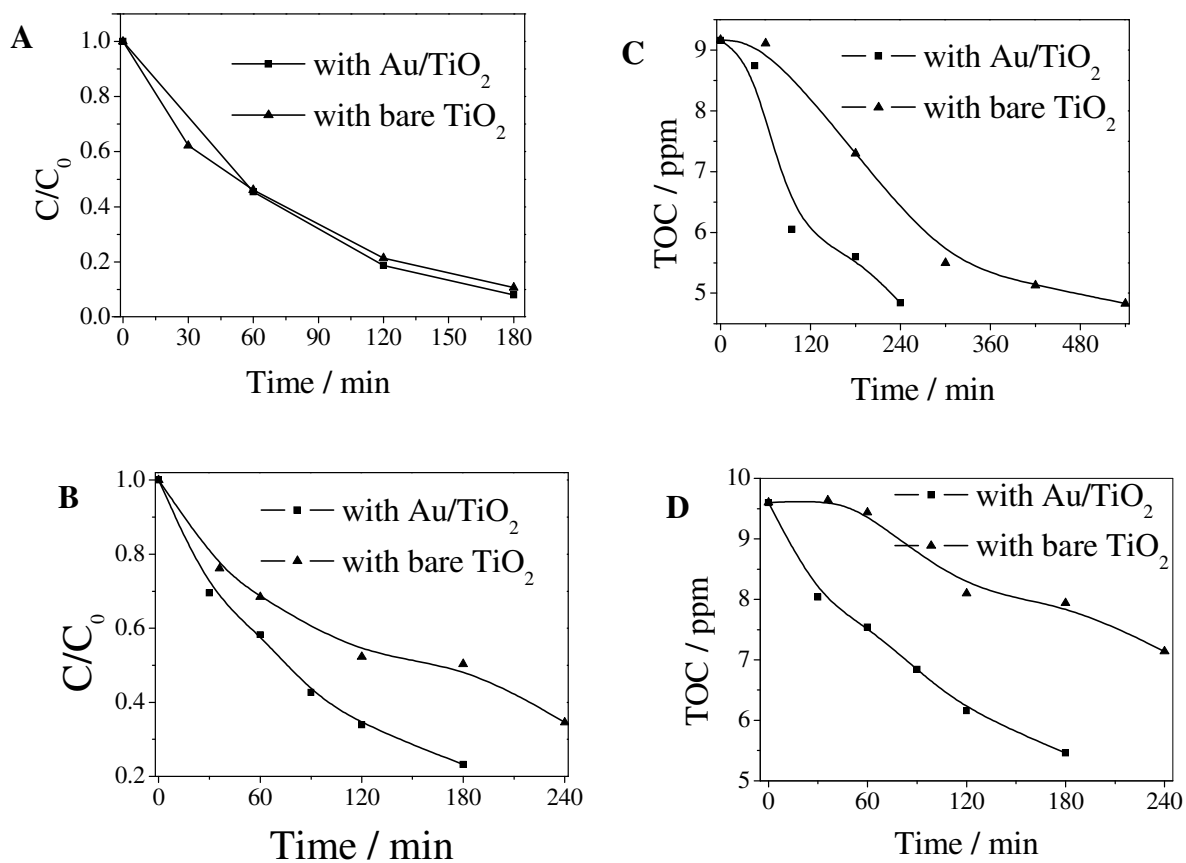

**Figure S6. Sonocatalytic degradation of EO ( $5.0 \times 10^{-5}$  M, pH = 3.5) under (A) Ar and (B) air atmospheres; (C) and (D) TOC removal corresponding to (A) and (B), respectively. Catalyst = 1 g/L.**

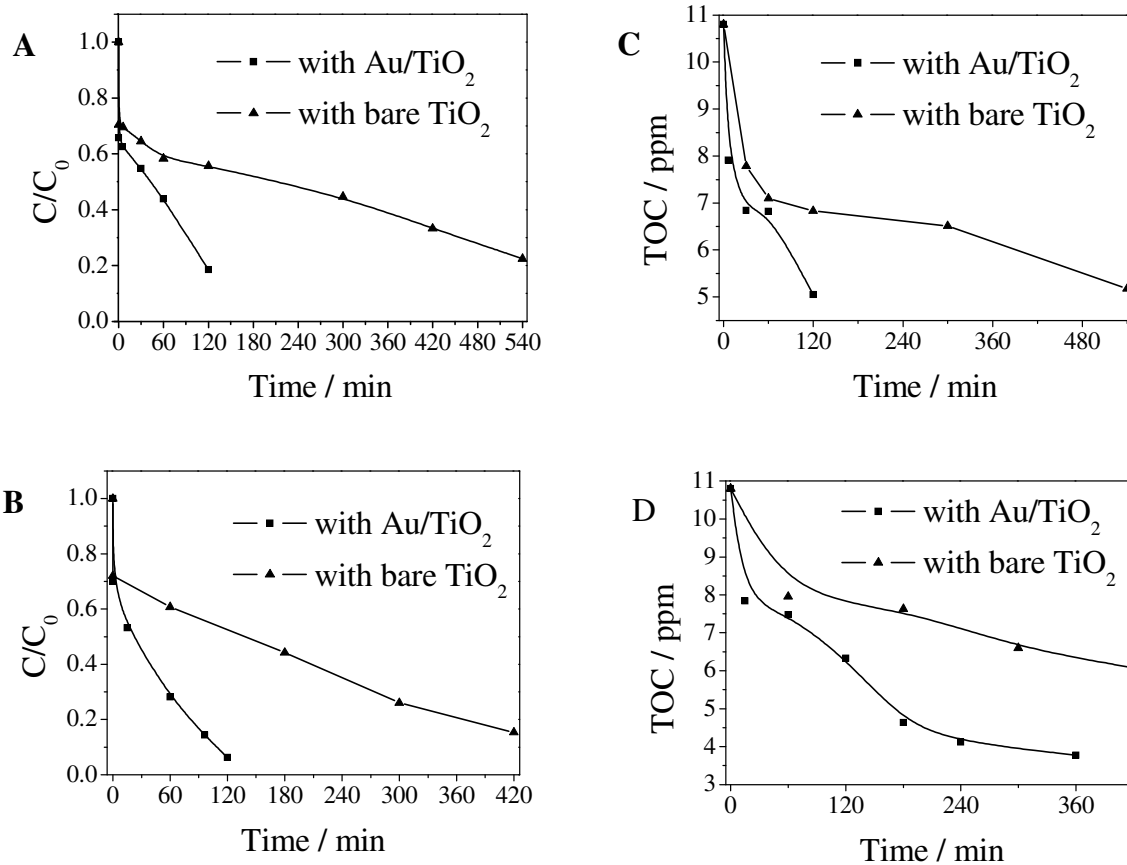

**Figure S7. Sonocatalytic degradation of ARG ( $5.0 \times 10^{-5}$  M, pH = 3.5) under (A) Ar and (B) air atmospheres; (C) and (D) TOC removal corresponding to (A) and (B), respectively. Catalyst = 1 g/L.**



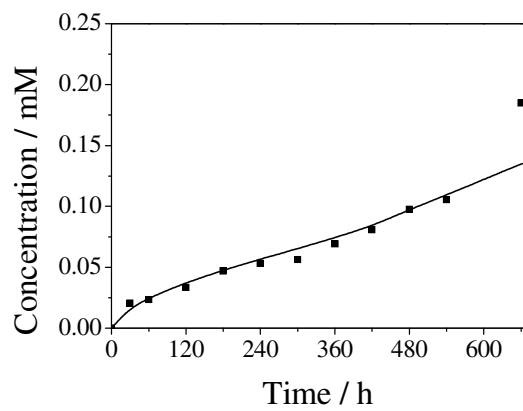

**Figure S8.  $\text{SO}_4^{2-}$  evolution during the sonocatalytic degradation of Org II ( $2.5 \times 10^{-4}$  M, pH = 3.5) in the presence of Au/ $\text{TiO}_2$  (1 g/L) under air atmosphere.**

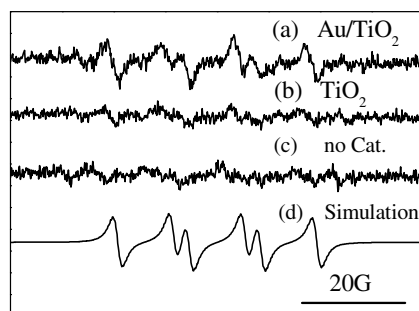

**Figure S9. EPR spectra of DMPO-OOH obtained by sonolysis of 62% methanol in water (v/v) for 10 minutes under air atmosphere (a) with Au/TiO<sub>2</sub>, (b) with TiO<sub>2</sub>, (c) without catalyst, and (d) simulation of (a). [DMPO]= 4 mM, pH = 3.5, catalyst = 1 g/L.**

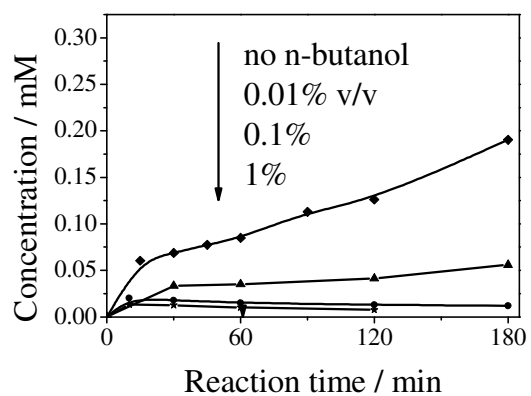

**Figure S10. [H<sub>2</sub>O<sub>2</sub>] profiles during sonocatalytic degradation of Org II ( $5.0 \times 10^{-5}$  M, pH = 3.5) over Au/TiO<sub>2</sub> (1 g/L) in the absence and presence of n-butanol under Ar atmosphere.**

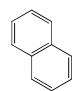

ERROR: invalidaccess  
OFFENDING COMMAND: --filter--

STACK:

/LZWDecode  
-filestream-  
[32 0 0 -120 0 120 ]  
true  
120  
32  
-savelevel-
